# Supplementary material
Source: PubMed Central journal article supplement (PMC3970501)
Supplement: 1320223111_pnas.201320223SI.pdf [file 1320223111_pnas.201320223SI.pdf]

# Supporting Information

Abe et al. 10.1073/pnas.1320223111

## SI Text

**Longer-Lasting Change in Water Diffusion in the Left M1, Right PM, and Left SPL Than in the Left PM and SMA.** The length of the time that the rTMS-induced changes in water diffusion were present was quantified as the last time point where the signal intensity of DWI data acquired with a b value of 1,200 s/mm<sup>2</sup> was significantly different to baseline, and the regions were ranked

accordingly. The Wilcoxon signed-rank test showed that the left M1, right PM, and left SPL retained the change in water diffusion longer than left PM ( $P = 0.02$ ,  $P = 0.006$ , and  $P = 0.03$ , respectively) and the SMA ( $P = 0.01$ ,  $P = 0.002$ , and  $P = 0.01$ , respectively). No difference was found between any pairs of regions among the left M1, left SPL, and right PM or between the SMA and left PM ( $P > 0.1$ ).

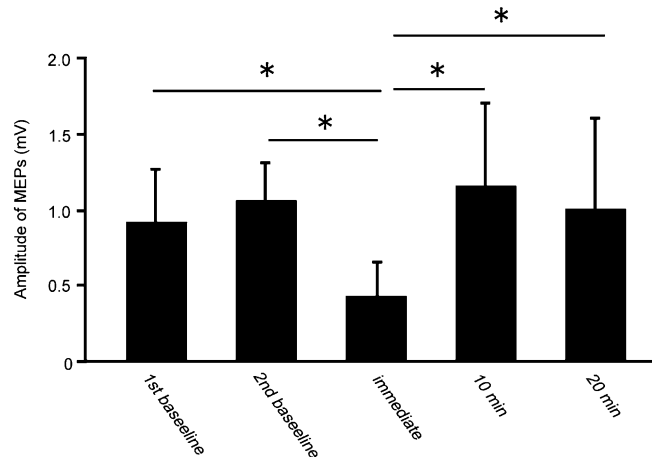

**Fig. S1.** Change in motor-evoked potential amplitude immediately after the end of repetitive transcranial magnetic stimulation. Motor-evoked potentials (MEPs) were measured to evaluate corticospinal excitability in response to stimulation of the primary motor cortex (M1). Twenty MEPs were recorded at each time point, and the average amplitude was compared across time points using one-way ANOVA followed by paired  $t$  tests with Bonferroni adjustments. Asterisks indicate significant difference (paired  $t$  test,  $P < 0.05$ ). One-way ANOVA showed a main effect of time point on MEP amplitude [ $F_{(4)} = 5.21$ ,  $P = 0.001$ ]. Post hoc tests indicated that MEP amplitude was similar at the two baseline time points (multiple comparisons test with Bonferroni adjustments,  $P = 0.45$ ). MEP amplitude was lower immediately after the end of repetitive transcranial magnetic stimulation (rTMS) than at each of the two baselines ( $P = 0.013$  and  $P = 0.0052$  for first and second baseline, respectively), but had recovered to baseline level by 10 min after rTMS ( $P = 0.027$  for 10 min after vs. immediately after rTMS and  $P = 0.35$  and  $P = 0.42$  for 10 min after vs. first and second baseline, respectively) and 20 min after rTMS ( $P = 0.032$  for 20 min after vs. immediately after rTMS and  $P = 0.48$  and  $P = 0.51$  for 20 min after vs. first and second baseline, respectively). These results show that the excitability of the corticospinal tract decreased immediately after the end of the low-frequency rTMS but recovered to the baseline levels by 10 min after rTMS, providing evidence that our stimulation protocol induced a transient long-term depression (LTD)-like plasticity in the stimulated M1, as reported in previous literature (1). These results do not necessarily suggest that LTD-like plasticity is retained for less time than the increase in water diffusion. Previous studies have indicated comparable retention of the two (2) when plasticity was measured at the intracortical level (1). The relation between long-term potentiation (LTP)/LTD-like plasticity and water diffusion remains unknown in human models, and this issue requires further investigation.

1. Romero JR, Ansel D, Sparing R, Gangitano M, Pascual-Leone A (2002) Subthreshold low frequency repetitive transcranial magnetic stimulation selectively decreases facilitation in the motor cortex. *Clin Neurophysiol* 113(1):101–107.
2. Ge WP, Duan S (2007) Persistent enhancement of neuron-glia signaling mediated by increased extracellular K<sup>+</sup> accompanying long-term synaptic potentiation. *J Neurophysiol* 97(3): 2564–2569.



## Longer-lasting group

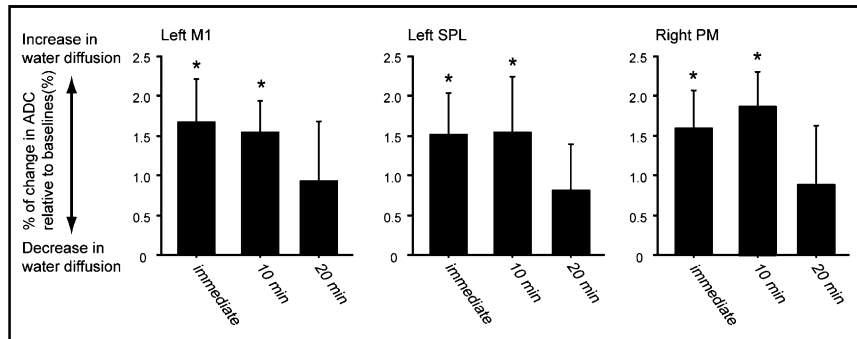

## Faster-decay group

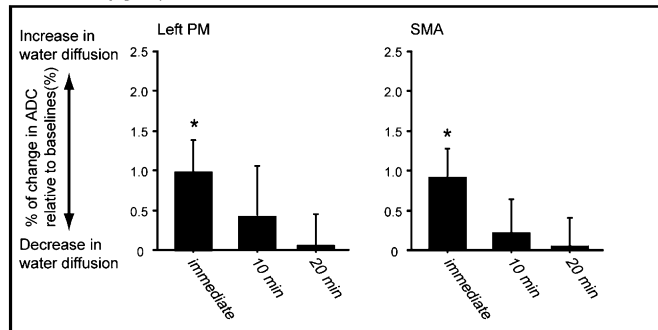

**Fig. S3.** Significant increase in the apparent diffusion coefficient after the end of rTMS. The apparent diffusion coefficient (ADC) has been used to evaluate intracortical water diffusion in previous studies (1, 2) and was computed using the following equation:  $ADC = \ln(S_{300}/S_{1,200})/(1200-300)$ , where  $S_{300}$  and  $S_{1,200}$  are the signal intensity of DWI data obtained with b values of 300 and 1,200  $s/mm^2$ , respectively. The figure shows percent change in ADC at each post-rTMS time point relative to the baseline time point:  $[(ADC_{\text{immediate, 10 min, or 20 min}} - ADC_{\text{baseline}})/ADC_{\text{baseline}}] \times 100$ . At each time point, the ADC was calculated using the mean signal intensity of DWI data obtained with a b value of 1,200  $s/mm^2$  ( $n = 72$  samples per time point) and the mean signal intensity of DWI data obtained with a b value of 300  $s/mm^2$  ( $n = 18$  samples per time point). The baseline ADC was the mean of the ADC in the two baseline sessions. Asterisks indicate that the ratio was different from zero ( $P < 0.05$  after Bonferroni-Holm adjustments). The results are consistent with those in Figs. 2 and 3.

1. Mottaghy FM, et al. (2003) Repetitive TMS temporarily alters brain diffusion. *Neurology* 60(9):1539–1541.
2. Duning T, et al. (2004) Repetitive TMS temporarily alters brain diffusion. *Neurology* 62(11):2144.



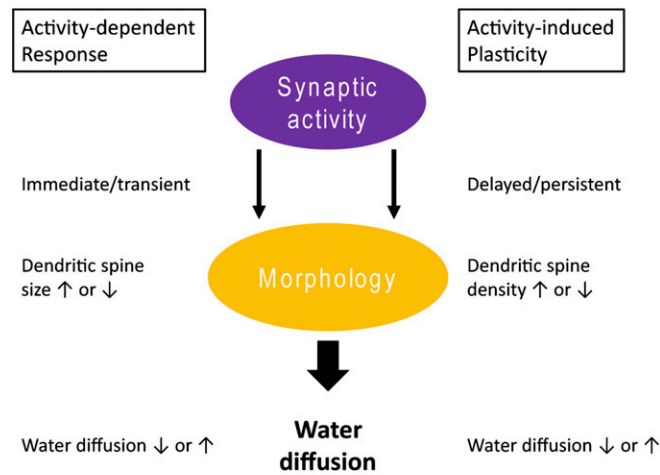

**Fig. S5.** Possible biological mechanisms underlying changes in intracortical water diffusion. This schema shows the possible biological mechanisms underpinning altered water diffusion in neural tissues. Synaptic activation, which includes intracellular molecular events, induces immediate and transient morphological changes in dendritic spines that occur within seconds to minutes (an activity-dependent response) (1–3) or delayed and persistent changes in dendritic spines that occur within hours to days (activity-induced plasticity) (4–9). Activity-dependent responses alter the size of dendritic spines and activity-induced plasticity modulates the size or density of the dendritic spines, both of which can modulate intracortical water diffusion (10, 11). Note that an increase in size or density would result in decreased water diffusion and a decrease in size or density would result in increased water diffusion. Interregional synchronization in water diffusion might reflect synchronized fluctuation of activity-dependent morphological responses between the regions. Low-frequency rTMS that induces LTD-like plasticity in the stimulated cortex decreases the density of dendritic spines and thus would be expected to increase intracortical water diffusion. Our results indicate that synchronization of basal fluctuations in the morphology of cortical microstructures between stimulated and remote regions might underlie formation of plasticity in remote regions after rTMS.

1. Fischer M, Kaech S, Knutti D, Matus A (1998) Rapid actin-based plasticity in dendritic spines. *Neuron* 20(5):847–854.
2. McKinney RA (2010) Excitatory amino acid involvement in dendritic spine formation, maintenance and remodelling. *J Physiol* 588(Pt 1):107–116.
3. Testa I, et al. (2012) Nanoscopy of living brain slices with low light levels. *Neuron* 75(6):992–1000.
4. Monfils MH, Teskey GC (2004) Induction of long-term depression is associated with decreased dendritic length and spine density in layers III and V of sensorimotor neocortex. *Synapse* 53(2):114–121.
5. Nägerl UV, Eberhorn N, Cambridge SB, Bonhoeffer T (2004) Bidirectional activity-dependent morphological plasticity in hippocampal neurons. *Neuron* 44(5):759–767.
6. Zhou Q, Homma KJ, Poo MM (2004) Shrinkage of dendritic spines associated with long-term depression of hippocampal synapses. *Neuron* 44(5):749–757.
7. Wang XB, Yang Y, Zhou Q (2007) Independent expression of synaptic and morphological plasticity associated with long-term depression. *J Neurosci* 27(45):12419–12429.
8. Bastrikova N, Gardner GA, Reece JM, Jeromin A, Dudek SM (2008) Synapse elimination accompanies functional plasticity in hippocampal neurons. *Proc Natl Acad Sci USA* 105(8):3123–3127.
9. Wosiski-Kuhn M, Stranahan AM (2012) Transient increases in dendritic spine density contribute to dentate gyrus long-term potentiation. *Synapse* 66(7):661–664.
10. Le Bihan D (2003) Looking into the functional architecture of the brain with diffusion MRI. *Nat Rev Neurosci* 4(6):469–480.
11. Sagi Y, et al. (2012) Learning in the fast lane: New insights into neuroplasticity. *Neuron* 73(6):1195–1203.
